# Supplementary material for: Specificity trumps flexibility—location-based stable associations between Symbiodiniaceae genera and Platygyra verweyi (Scleractinia; Merulinidae)
Source: PeerJ. 2020 May 5;8:e8791. doi: 10.7717/peerj.8791 (PMC7207216; doi:10.7717/peerj.8791)
Supplement: Supplemental Information 1 [file peerj-08-8791-s001.xlsx]

## Sheet: THS
QPCR
							COL= native NPP-OL		TOW= NPP-OL to WLT transfer			TOI= NPP-OL to IL transfer		CWLT= native WLT		CIL= native IL		TWO= WLT to NPP-OL transfer
Samples	MeanCp	STD Cp	Mean conc	STD conc
A1, A2	30.5569	0.153322	2481.08	348.296	1	0.982079			15.03 COL1	0.982079
I1, I2	24.2992	0.358525	407882	102556	1				15.03 COL2	0.793823
A3, A4	29.0886	0.107863	9195.97	861.091	2	0.793823			15.03 COL3	0.990545
I3, I4	26.1073	0.206547	106219	16810.3	2				15.03 COL4	0.987062
A5, A6	30.5239	0.260136	2580.28	610.072	3	0.990545			15.03 COL5	0.952685
I5, I6	23.2843	0.00668963	810921	3660.69	3				15.03 TOW1	0.988414
A7, A8	34.4575	0.767256	3246.44	971.984	4	0.987062			15.03 TOW2	0.979654
I7, I8	23.5612	0.50994	743003	213065	4				15.03 TOW3	0.99177
A10, A9	31.684	0.0871551	10238.5	401.774	5	0.952685			15.03 TOW4	0.997458
I10, I9	23.8463	0.0299079	618450	10547.1	5				15.03 TOW5	0.986404
A11, A12	31.3434	0.260478	1203.99	293.402	6	0.988414			15.03 TOI1	0.989927
I11, I12	24.6725	0.110534	308137	24543	6				15.03 TOI2	0.981945
A13, A14	31.6276	0.109106	908.257	94.418	7	0.979654			15.03 TOI3	0.99521
I13, I14	25.8234	0.00633713	131195	631.803	7				15.03 TOI4	0.998267
A15, A16	31.742	0.366776	836.288	288.047	8	0.99177			15.03 TOI5	0.973725
I15, I16	24.7036	0.199792	302318	43482.1	8				15.03 CWLT1	0.000208112
A17, A18	31.5909	0.784803	1067.05	731.317	9	0.997458			15.03 CWLT2	0.000508053
I17, I18	22.6263	0.0954759	1.2562e+06	78238.5	9				15.03 CWLT3	0.000216912
A19, A20	31.4774	0.305965	1066.48	305.534	10	0.986404			15.03 TWO3	0.972203
I19, I20	25.0602	0.0588951	232130	10036.4	10				15.03 CIL1	0.00258633
A21, A22	31.2197	0.0556154	1334.27	69.7839	11	0.989927			15.03 CIL2	0.000162822
I21, I22	24.3465	0.323695	393373	89670.9	11				15.03 CIL3	0.000921009
A23, A24	31.5883	0.147658	945.027	132.572	12	0.981945			15.03 CIL4	0.000354436
I23, I24	25.6099	0.0255777	154193	2968.69	12				15.03 CIL5	0.000294741
B1, B2	31.7018	0.163004	848.849	131.882	13	0.99521			15.05 COL1	0.956811
J1, J2	23.9094	0.110242	529091	40543.2	13				15.05 COL2	0.871779
B3, B4	32.1788	0.156738	535.542	81.3578	14	0.998267			15.05 COL3	0.996664
J3, J4	23.0878	0.0578817	925579	35790.8	14				15.05 COL4	0.999672
B5, B6	30.435	0.115214	2768.59	291.18	15	0.973725			15.05 COL5	0.965994
J5, J6	24.6833	0.259823	307802	57382.4	15				15.05 TOW1	0.987462
B7, B8	23.8641	0.115572	546059	43766.5	16	0.000208112			15.05 TOW2	0.963407
J7, J8	32.6992	0.530025	340.994	171.215	16				15.05 TOW3	0.989386
B10, B9	23.5522	0.0762868	676394	35267.8	17	0.000508053			15.05 TOW4	0.962515
J10, J9	31.579	0.626923	1031.46	581.966	17				15.05 TOW5	0.982098
B11, B12	23.211	0.00790297	851965	4526.99	18	0.000216912			15.05 TOI1	0.960609
J11, J12	32.1375	0.0310654	554.526	16.7349	18				15.05 TOI3	0.991899
B13, B14	30.9694	0.337562	1726	534.477	19	0.972203			15.05 TOI4	0.998698
J13, J14	25.4008	0.180729	181102	24335.6	19				15.05 TOI5	0.908233
B15, B16	23.9838	0.145252	572746	47386	20	0.00258633			15.05 CWLT1	0.000205691
J15, J16	33.6161	0.210774	4455.45	387.021	20				15.05 CWLT2	0.00279468
B17, B18	24.1376	0.0899218	450830	28497.1	21	0.000162822			15.05 CWLT3	0.00102183
J17, J18	33.0859	0.23533	220.251	51.53	21				15.05 TWO3	0.97301
B19, B20	21.9704	0.0488646	1.80271e+06	50225.7	22	0.000921009			15.05 CIL1	0.00423089
J19, J20	33.3502	0.290661	4985.52	603.995	22				15.05 CIL2	0.00337349
B21, B22	24.8329	0.156241	274778	31132.7	23	0.000354436			15.05 CIL3	7.21878e-05
J21, J22	32.7891	0.00726407	292.278	2.10921	23				15.05 CIL4	0.00398514
B23, B24	24.2053	0.191719	431246	58167.6	24	0.000294741			15.05 CIL5	0.00817936
J23, J24	32.5511	0.364141	381.43	134.012	24				15.07 COL1	0.969089
C1, C2	31.0322	0.364361	1634.24	545.972	25	0.956811			15.07 COL2	0.819581
K1, K2	26.0713	0.0629443	108615	5250.19	25				15.07 COL3	0.995076
C3, C4	31.0213	0.138131	1612.39	207.488	26	0.871779			15.07 COL4	0.997921
K3, K4	27.5763	0.0149908	32888.2	403.623	26				15.07 COL5	0.992191
C5, C6	32.0756	0.158137	592.085	90.4241	27	0.996664			15.07 TOW1	0.979718
K5, K6	23.9035	0.0505302	530692	18648.5	27				15.07 TOW2	0.972986
C7, C8	33.3586	0.864267	196.476	152.903	28	0.999672			15.07 TOW3	0.986586
K7, K8	22.0855	0.321397	1.79454e+06	363512	28				15.07 TOW4	0.998873
C10, C9	30.815	0.171364	1957.75	309.785	29	0.965994			15.07 TOW5	0.985868
K10, K9	25.5247	0.336265	166840	41632	29				15.07 CWLT1	0.000471611
C11, C12	31.0191	0.108038	1613.23	162.53	30	0.987462			15.07 CWLT2	0.000242982
K11, K12	24.378	0.162486	381156	43965.6	30				15.07 CWLT3	0.000110077
C13, C14	30.9303	0.185552	1760.74	302.707	31	0.963407			15.07 TWO3	0.97645
K13, K14	25.7571	0.243077	139068	25469.8	31				15.09 COL1	0.980034
C15, C16	30.8585	0.535407	1980.94	946.337	32	0.989386			15.09 COL2	0.99415
K15, K16	23.8413	0.00754702	553948	2899.22	32				15.09 COL3	0.996135
C17, C18	31.6284	0.238316	916.494	206.707	33	0.962515			15.09 COL4	0.995862
K17, K18	26.6595	0.434469	70600.1	23708.2	33				15.09 COL5	0.998184
C19, C20	30.9066	0.414193	1851.33	696.247	34	0.982098			15.09 TOW1	0.98877
K19, K20	24.6861	0.0134338	304689	2954.38	34				15.09 TOW2	0.98363
C21, C22	31.0182	0.337086	1649.23	510.874	35	0.960609			15.09 TOW3	0.991317
K21, K22	25.9344	0.0786318	120658	7240.85	35				15.09 TOW4	0.996365
C23, C24	31.9233	0.154267	685.778	101.655	36	0.991899			15.09 TOW5	0.996357
K23, K24	24.9508	0.127332	251914	23403.9	36				15.09 CWLT1	0.000301649
D1, D2	32.8057	0.174583	289.568	50	37	0.998698			15.09 CWLT2	0.00118585
L1, L2	23.5729	0.00834975	666478	3809.1	37				15.09 CWLT3	5.76291e-05
D3, D4	32.0164	0.401639	8898.07	1577.98	38	0.908233			15.11 COL1	0.980784
L3, L4	25.3386	0.0841509	264198	12673.2	38				15.11 COL3	0.9752
D5, D6	22.8275	0.0146032	1.09982e+06	10592.1	39	0.000205691			15.11 COL4	0.963934
L5, L6	31.9462	0.277777	678.81	179.846	39				15.11 COL5	0.992588
D7, D8	24.146	0.00723618	521264	2150.94	40	0.00279468			15.11 TOW1	0.986972
L7, L8	33.6816	0.517103	4382.55	925.276	40				15.11 TOW2	0.938642
G13, G14	27.5173	0.787585	45868.4	18601.1	41	0.00602663			15.11 TOW3	0.969287
O13, O14	35	0	834.324	0	41				15.11 TOW4	0.990678
D11, D12	31.0627	0.135485	1551.06	196.082	42	0.97301			15.11 TOW5	0.990054
L11, L12	25.5155	0.319372	167754	39781.6	42				15.11 CWLT1	2.89983e-05
G15, G16	22.29	0.211853	702933	78725.5	43	0.000395483			15.11 CWLT2	0.00268574
O15, O16	35	0	834.324	0	43				15.11 CWLT3	0.170464
D15, D16	24.4119	0.108438	448343	27706.3	44	0.00337349
L15, L16	33.5588	0.031586	4552.8	59.4988	44
D17, D18	22.2698	0.0937681	1.58178e+06	94987.5	45	7.21878e-05
L17, L18	32.748	0.71976	342.58	225.755	45
D21, D22	25.7149	0.0663635	213204	8019.33	46	0.00398514
L21, L22	35	0	2559.14	0	46
D23, D24	26.5634	0.0730604	132725	5335.24	47	0.00817936
L23, L24	34.4344	0.799831	3283.69	1024.66	47
E1, E2	31.1616	0.0447148	1408.81	59.1278	48	0.969089
M1, M2	25.825	0.287045	132501	28678	48
E3, E4	30.9042	0.123549	1796.94	206.073	49	0.819581
M3, M4	27.9517	0.301509	24488.7	6074.35	49
E5, E6	31.7474	0.107306	809.897	83.1563	50	0.995076
M5, M6	24.0162	0.104032	491020	35692.7	50
E7, E8	32.5458	0.623295	406.089	234.814	51	0.997921
M7, M8	23.7829	0.349327	584641	139874	51
E10, E9	31.652	0.19174	892.206	162.523	52	0.992191
M10, M9	24.5334	0.0236289	340064	5758.55	52
E11, E12	30.7171	0.0331191	2131.03	65.203	53	0.979718
M11, M12	24.669	0.0963898	308813	21451.2	53
E13, E14	31.4343	0.10509	1091.34	108.55	54	0.972986
M13, M14	25.964	0.0627098	117923	5652.32	54
E15, E16	30.6307	0.351535	2365.69	752.889	55	0.986586
M15, M16	23.9277	0.0735799	521994	26735.1	55
E17, E18	31.8289	0.0430273	747.325	30.901	56	0.998873
M17, M18	21.9147	0.188778	1.98652e+06	235293	56
E19, E20	31.0366	0.120778	1588.02	178.894	57	0.985868
M19, M20	24.5668	0.0914967	332338	21811.3	57
E21, E22	23.9661	0.157171	509316	55736.6	58	0.000471611
M21, M22	31.8673	0.0774247	720.937	53.6781	58
E23, E24	24.307	0.0600123	399780	17007.3	59	0.000242982
M23, M24	32.9229	0.753916	291.489	200.717	59
F1, F2	23.7307	0.0760769	598368	31385.6	60	0.000110077
N1, N2	33.1846	0.131175	197.62	26.0213	60
F3, F4	31.0715	0.309279	1563.25	446.262	61	0.97645
N3, N4	25.3088	0.231101	194449	33211.3	61
F5, F6	31.262	0.403505	1326.09	492.382	62	0.980034
N5, N6	25.2939	0.0161536	195276	2341.09	62
F7, F8	32.2242	0.701131	567.816	360.356	63	0.99415
N7, N8	24.7642	0.208948	289495	43653.3	63
F10, F9	31.5089	0.0249665	1014.46	24.0725	64	0.996135
N10, N9	23.3353	0.106604	784408	56522.4	64
F11, F12	30.9499	0.387806	1770.76	626.301	65	0.995862
N11, N12	22.6011	0.143576	1.27839e+06	119481	65
F13, F14	31.4898	0.145149	1037.71	142.624	66	0.998184
N13, N14	22.1522	0.219479	1.71151e+06	238455	66
F15, F16	31.0373	0.347756	1622.47	518.297	67	0.98877
N15, N16	24.2116	0.144993	428561	43786.9	67
F17, F18	30.8771	0.255403	1861.89	437.834	68	0.98363
N17, N18	24.5608	0.233436	335631	55961.6	68
F19, F20	30.8376	0.122252	1911.41	216.392	69	0.991317
N19, N20	23.6003	0.0926452	654692	41544.8	69
F21, F22	31.0292	0.32459	1629.54	486.822	70	0.996365
N21, N22	22.5314	0.192708	1.33986e+06	167284	70
F23, F24	30.7407	0.155087	2094.83	299.418	71	0.996357
N23, N24	22.1385	0.028327	1.71884e+06	30984.6	71
G1, G2	22.6749	0.014309	1.21585e+06	11384.5	72	0.000301649
O1, O2	31.4411	0.283254	1100.61	292.119	72
G3, G4	22.1142	0.00829183	1.66045e+06	7851.25	73	0.00118585
O3, O4	32.9384	0.15435	5914.16	388.478	73
G5, G6	22.7651	0.373313	1.16186e+06	282316	74	5.76291e-05
O5, O6	33.1918	0.33882	200.883	67.2372	74
G7, G8	31.0644	0.0607826	1543.71	87.7438	75	0.980784
O7, O8	25.0373	0.116293	236374	20140.7	75
G10, G9	30.2593	0.597175	3472.02	1796.67	76	0.9752
O10, O9	24.2757	0.146647	409586	42452.4	76
G11, G12	31.7313	0.285136	10063.9	1286.2	77	0.963934
O11, O12	23.3797	0.0161765	806938	7443.57	77
G13, G14	31.1205	0.639494	1591.71	900.947	78	0.992588
O13, O14	23.6362	0.134127	639435	58804.3	78
G15, G16	31.5622	0.0074659	964.187	6.85525	79	0.986972
O15, O16	25.1402	0.112629	219133	18169.5	79
G17, G18	31.2442	0.688589	1436.69	871.352	80	0.938642
O17, O18	26.8055	0.717321	65935	35600.4	80
G19, G20	30.0466	0.137099	3943.44	486.154	81	0.969287
O19, O20	24.4045	0.10698	373358	28425.8	81
G21, G22	31.0469	0.56098	1672.7	839.264	82	0.990678
O21, O22	23.8972	0.0822018	533267	30464.8	82
G23, G24	30.3823	0.0601046	2899.69	159.001	83	0.990054
O23, O24	23.1869	0.0196254	865903	11411.7	83
H8, H9	22.2673	0.0984349	1.58447e+06	99865.2	84	2.89983e-05
P1, P2	33.6212	0.595098	137.844	78.9783	84
B1, B2	23.8922	0.107492	602984	36938.1	85	0.00268574
J1, J2	33.4011	0.212343	4871.46	430.626	85
B3, B4	23.9637	0.0609107	578517	20090.3	86	0.170464
J3, J4	24.8115	0.00227523	356643	462.723	86
Experiment: ths Active filter: SYBR Green I / HRM Dye (465-510)
