# Supplementary material for: Specificity trumps flexibility—location-based stable associations between Symbiodiniaceae genera and Platygyra verweyi (Scleractinia; Merulinidae)
Source: PeerJ. 2020 May 5;8:e8791. doi: 10.7717/peerj.8791 (PMC7207216; doi:10.7717/peerj.8791)
Supplement: Supplemental Information 2 [file peerj-08-8791-s002.xlsx]

## Sheet: ct
Experiment: 20160805 ths Active filter: SYBR Green I / HRM Dye (465-510)
Samples	MeanCp	STD Cp	Mean conc	STD conc				Group	Colony	2015 Nov	2016 April
E21, E22	31.6955	0.807103	10552.6	3751.69	1	0.973692		COL	1	0.973692	0.801673
M21, M22	22.7256	0.0119908	1.17168e+06	8011.53	1			COL	2	0.96358	0.707938
E23, E24	31.6018	0.23178	10653	1113.95	2	0.96358		COL	3	0.959973	0.822644
M23, M24	23.2977	0.0106394	845551	5130	2			COL	4	0.934351	0.559057
F1, F2	31.4617	0.616463	11561.5	3199.02	3	0.959973		COL	5	0.970224	0.551139
N1, N2	23.3263	0.00357654	831850	1696.56	3			COL	6	0.990386	0.819904
F3, F4	29.4602	0.407698	29560.6	5911.13	4	0.934351		COL	7	0.969504	0.619954
N3, N4	22.6172	0.394196	1.26217e+06	281356	4			COL	8	0.92255	0.91446
B5, B6	31.8787	0.28286	9419.58	1186.68	5	0.970224		COL	9	0.987344	0.966085
J5, J6	23.1489	0.0705893	920801	37055.3	5			COL	10	0.92221	0.679688
B7, B8	31.9825	0.333956	9009.08	1332.56	6	0.990386		COL	11	0.891148	0.390237						Error: 0.0380
J7, J8	21.208	0.0347058	2.7841e+06	55096.3	6			COL	12	0.97358	0.767658						Efficiency: 1.769
B10, B9	31.6008	0.101997	10632.1	489.981	7	0.969504		COL	13	0.927377	0.697901						Slope: -4.038
J10, J9	22.9791	0.00902881	1.01402e+06	5220.79	7			COL	14	0.985419	0.895113						YIntercept: 47.36
B11, B12	31.1062	0.411568	13450.6	2540.32	8	0.92255		COL	15	0.976041	0.696628						Link: 0.000
J11, J12	24.289	0.0735661	480648	20157.7	8			COL	16	0.989292	0.8688
B13, B14	31.7039	0.0235544	10143.2	107.505	9	0.987344		COL	17	0.966377	0.830355
J13, J14	21.4883	0.0784163	2.37391e+06	106118	9			COL	18	0.961994	0.888948
B15, B16	31.4764	0.248985	11281.2	1273.68	10	0.92221		COL	19	0.986944	0.831313
J15, J16	24.606	0.0869561	401220	19886.9	10			COL	20	0.976913	0.83268
B17, B18	32.0026	0.29516	8916.9	1165.61	11	0.891148		COL	21	0.882555	0.592762
J17, J18	25.6683	0.0964945	219002	11993.5	11			COL	22	0.940878	0.710773
B19, B20	31.2624	0.377585	12497.3	2153.27	12	0.97358		COL	23	0.77342	0.805287
J19, J20	22.4373	0.0678809	1.38156e+06	53465.1	12			COL	24	0.992739	0.913051
B21, B22	31.4796	0.0647076	11228.5	330.075	13	0.927377		COL	25	0.950496	0.734829
J21, J22	24.4858	0.14348	430153	35155.5	13			COL	26	0.980285	0.93558
B23, B24	31.8421	0.255405	9567.25	1090.56	14	0.985419		COL	27	0.98926	0.913286
J23, J24	21.8417	0.023446	1.93973e+06	25933.5	14			COL	28	0.97739	0.915544
C1, C2	31.3975	0.118363	11662.2	629.085	15	0.976041		COL	29	0.934936	0.767676
K1, K2	22.3852	0.150419	1.42529e+06	122106	15			COL	30	0.961274	0.776312
C3, C4	31.9884	0.1189	8938.23	472.092	16	0.989292		CWLT	1	0.00131553	0.000404058
K3, K4	21.4125	0.00482251	2.47746e+06	6813.07	16			CWLT	2	0.105632	0.00996057
C5, C6	31.7013	0.0294769	10155.4	134.712	17	0.966377		CWLT	3	0.0024339	0.000213879
K5, K6	23.237	0.0676632	875644	33778.1	17			CWLT	4	0.269083
C7, C8	31.264	0.0174006	12387	98.8389	18	0.961994		CWLT	5	0.000872097	0.00187542
K7, K8	23.1152	0.175242	940599	93839	18			CWLT	6	0.00110716	0.000203343
F23, F24	35	0	834.324	0	19	0.986944		CWLT	7	0.00675233	0.00882425
N23, N24	24.7712	0.272344	189213	27204.7	19			CWLT	8	0.178821	0.0119176
C11, C12	32.3096	0.21516	7769.73	731.386	20	0.976913		CWLT	9	0.00439466	0.000342869
K11, K12	23.0306	0.145519	986331	81753.8	20			CWLT	10	0.000227686	0.000613776
C13, C14	28.6358	0.66894	45614.5	15263.4	21	0.882555		CWLT	11	0.00458047	0.00579058
K13, K14	22.9553	0.0742507	1.02833e+06	43527.8	21			CWLT	12	0.00118174	0.000225417
C15, C16	31.1532	0.700871	13407.1	4255.61	22	0.940878		CWLT	13	0.000811665	n/a
K15, K16	23.7904	0.180044	640092	65602.8	22			CWLT	14	0.00103665	0.00035131
C17, C18	27.6677	0.0477023	73125.3	1844.33	23	0.77342		CWLT	15	0.000104476	0.0017671
K17, K18	23.5785	0.694244	748829	288946	23			CWLT	16	0.869979	0
G1, G2	35	0	834.324	0	24	0.992739		CWLT	17	0.000251887	0.000267236
O1, O2	23.6437	0.0829387	342218	15031.4	24			CWLT	18	0.000151729	0.000118395
C21, C22	30.9473	0.173536	14362.3	1157.07	25	0.950496		CWLT	19	0.000798721	9.55532e-05
K21, K22	23.3363	0.049822	827285	23500.7	25			CWLT	20	0.000189121	0.00253826
C23, C24	32.1926	0.0652977	8161.39	234.684	26	0.980285		CWLT	21	1	0.000202692
K23, K24	22.6588	0.0483933	1.21741e+06	33591.4	26			CWLT	22	0.00720275	0.000435125
D1, D2	33.56	0.845254	4706.61	1613.21	27	0.98926		CWLT	23	1	0.711227
L1, L2	22.5447	0.120762	1.30058e+06	89492.6	27			CWLT	24	0.560534	0.0228514
D3, D4	32.1157	0.023924	8441.67	89.2514	28	0.97739		CWLT	25	0.821457	0
L3, L4	22.8491	0.176065	1.09474e+06	109728	28			CWLT	26	0.0154181	0.000152739
D5, D6	31.8857	0.417323	9438.3	1748.29	29	0.934936		CWLT	27	0.0377046	0.00303066
L5, L6	24.5809	0.0596765	406868	13843.2	29			CWLT	28	0.0934772	n/a
D7, D8	31.7828	0.121571	9797.77	533.878	30	0.961274		CWLT	29	0.00802525	0.000164428
L7, L8	23.558	0.108083	729607	44939.9	30			CWLT	30	0.00464982	0.000134471
G3, G4	35	0	834.324	0	31	0.985866		TOW	1	0.985866	0.75608
O3, O4	24.9139	0.075123	174592	6946.4	31			TOW	2	0.963129	0.612686
D11, D12	31.4839	0.170175	11222.2	866.68	32	0.963129		TOW	3	0.919188	0.801866
L11, L12	23.2288	0.0138084	879428	6924.74	32			TOW	4	0.951767	0.875387
D13, D14	31.4445	0.376828	11498.2	1962.01	33	0.919188		TOW	5	0.911007	0.690862
L13, L14	24.6444	0.0430773	392354	9637.07	33			TOW	6	0.930059	0.727451
D15, D16	31.4001	0.301862	11699.8	1605.08	34	0.951767		TOW	7	0.932787	0.460999
L15, L16	23.6477	0.0340668	692608	13454.1	34			TOW	8	0.977418	0.754822
D17, D18	31.8039	0.279327	9739.48	1215.68	35	0.911007		TOW	9	0.976063	0.713906
L17, L18	25.1219	0.11616	299104	19798.1	35			TOW	10	0.917512	0.955281
D19, D20	30.9981	0.113588	14013	737.825	36	0.930059		TOW	11	0.962135	0.54672
L19, L20	24.0234	0.0288161	559026	9185.67	36			TOW	12	0.973301	n/a
D21, D22	31.2241	0.100252	12622.5	581.063	37	0.932787		TOW	13	0.984849	0.465005
L21, L22	24.1319	0.0431354	525530	12925.6	37			TOW	14	0.971333	0.626252
D23, D24	31.2953	0.438442	12345.1	2462.21	38	0.977418		TOW	15	0.99102	0.82014
L23, L24	22.1778	0.112093	1.60299e+06	102394	38			TOW	16	0.982762	0.450679
E1, E2	31.5691	0.509411	10936.7	2499.51	39	0.976063		TOW	17	0.955378	0.854862
M1, M2	22.4952	0.12431	1.33787e+06	94758.6	39			TOW	18	0.940994	0.655925
E3, E4	31.0922	0.213026	13441.2	1320.49	40	0.917512		TOW	19	0.868399	0.995469
M3, M4	24.4096	0.0182808	448517	4675.51	40			TOW	20	0.872631	0.992323
E5, E6	32.057	0.043857	8664.19	168.354	41	0.962135		TOW	21	0.913239	0.998625
M5, M6	23.7309	0.0024154	660453	909.69	41			TOW	22	0.831377	0.980787
E7, E8	31.3211	0.26998	12117.4	1492.73	42	0.973301		TOW	23	0.986764	0.999092
M7, M8	22.5102	0.0576134	1.32522e+06	43530.6	42			TOW	24	0.297323	0.981608
E10, E9	31.6555	0.284589	10413.1	1332.63	43	0.984849		TOW	25	0.965976	1
M10, M9	21.7632	0.114622	2.03062e+06	132633	43			TOW	26	0.990402	1
E11, E12	31.3973	0.0850242	11659	451.88	44	0.971333		TOW	27	0.972164	0.997432
M11, M12	22.7062	0.0661244	1.18515e+06	44678	44			TOW	28	0.984079	0.994752
G5, G6	35	0	834.324	0	45	0.99102		TOW	29	0.988198	0.992102
O5, O6	24.0477	0.066658	276233	9752.52	45			TOW	30	0.925087	0.993865
E15, E16	31.8077	0.111872	9687.92	485.288	46	0.982762		TWO	1	0.382633	0.655037
M15, M16	22.1179	0.00191083	1.65698e+06	1805.51	46			TWO	2	0.84058	0.994564
E17, E18	31.804	0.326665	9754.09	1422.47	47	0.955378		TWO	3	n/a	n/a
M17, M18	23.8241	0.0725778	626525	25922.8	47			TWO	4	n/a	n/a
E19, E20	31.718	0.286037	10124.5	1298.75	48	0.940994		TWO	5	0.100662	0.916694
M19, M20	24.275	0.0462024	484377	12760.3	48			TWO	6	n/a	n/a
F5, F6	31.5637	0.794952	11191.6	3942.94	49	0.868399		TWO	7	0.362398	0.989789
N5, N6	25.653	0.207024	221552	25995.7	49			TWO	8	0.79318	0.993643
F7, F8	30.8443	0.181472	15070.4	1274.99	50	0.872631		TWO	9	0.0922735	n/a
N7, N8	25.0588	0.0267102	309750	4717.75	50			TWO	10	0.446068	0.995674
F10, F9	31.0934	0.0803737	13403.4	497.477	51	0.913239		TWO	11	0.333474	0.986316
N10, N9	24.5121	0.0772189	423249	18631.2	51			TWO	12	n/a	n/a
F11, F12	30.8172	0.422345	15394.5	3018.65	52	0.831377		TWO	13	0.107739	0.993477
N11, N12	25.6002	0.109418	227702	14170.4	52			TWO	14	0.240313	0.991967
F13, F14	31.0406	0.768913	14207.6	4953.06	53	0.986764		TWO	15	0.503327	1
N13, N14	20.9761	0.00409572	3.17753e+06	7421.34	53			TWO	16	0.825793	0.976475
F15, F16	26.1708	0.746034	172576	69837	54	0.297323		TWO	17	0.533868	0.977617
N15, N16	25.6664	0.00211371	219067	262.943	54			TWO	18	0.21472	1
F17, F18	30.7213	0.25187	15993.3	1885.51	55	0.965976		TWO	19	0.632259	n/a
N17, N18	22.4614	0.00325359	1.36222e+06	2527.39	55			TWO	20	0.905506	1
F19, F20	31.9075	0.0157126	9258.98	64.8848	56	0.990402		TWO	21	0.879868	0.989828
N19, N20	21.157	0.0368839	2.86638e+06	60283.9	56			TWO	22	n/a	n/a
F21, F22	31.1068	0.129254	13328.5	794.816	57	0.972164		TWO	23	0.98288	0.998075
N21, N22	22.4188	0.0842563	1.3965e+06	67071.7	57			TWO	24	0.617739	1
F23, F24	31.7873	0.109373	9776.33	479.213	58	0.984079		TWO	25	0.973384	0.996275
N23, N24	21.9603	0.00156253	1.81278e+06	1615.23	58			TWO	26	0.928699	0.990747
G1, G2	31.035	0.0347828	13765.8	221.698	59	0.988198		TWO	27	0.447608	0.99603
O1, O2	20.8279	0.0287171	3.45791e+06	56623.6	59			TWO	28	0.899001	0.989115
G3, G4	30.9856	0.00208195	14084.2	13.6058	60	0.925087		TWO	29	0.735533	0.991069
O3, O4	24.1445	0.0404559	521772	12036.1	60			TWO	30	n/a	n/a
G5, G6	19.7054	0.0149786	6.5584e+06	56017.8	61	0.00131553
O5, O6	29.7069	0.0970237	25917.3	1229.09	61
G7, G8	23.5047	0.0343268	751471	14708.9	62	0.105632
O7, O8	25.3291	0.18898	266263	28638.5	62
G10, G9	20.8504	0.0367236	3.41406e+06	71490.5	63	0.0024339
O10, O9	29.7826	0.131718	24989.3	1603.5	63
G11, G12	31.3217	0.171995	12083.8	949.745	64	0.269083
O11, O12	31.1021	0.0392873	13345.8	242.08	64
G13, G14	22.1817	0.0752209	1.59846e+06	68544	65	0.000872097
O13, O14	33.8193	0.705603	4185.69	1190.54	65
G15, G16	21.6913	0.031056	2.11351e+06	37427.3	66	0.00110716
O15, O16	32.5393	0.205099	7027.74	624.254	66
G17, G18	21.5451	0.053499	2.29755e+06	70082.1	67	0.00675233
O17, O18	28.5239	0.0993414	46858	2382.61	67
G19, G20	21.6396	0.0268728	2.17662e+06	33353.5	68	0.178821
O19, O20	22.3865	0.0524476	1.42196e+06	42521.6	68
G21, G22	22.9363	0.0338939	1.03915e+06	20083.4	69	0.00439466
O21, O22	31.1078	0.760807	13760.6	4735.77	69
G23, G24	19.2809	0.05644	8.35635e+06	268901	70	0.000227686
O23, O24	33.0284	0.288563	5709.19	696.977	70
H1, H2	22.7727	0.059068	1.14098e+06	38424.9	71	0.00458047
P1, P2	30.7493	0.167556	15750.9	1235.48	71
H3, H4	21.7455	0.103314	2.05076e+06	120750	72	0.00118174
P3, P4	32.4784	0.457386	7279.02	1438.3	72
H5, H6	20.9404	0.00368491	3.24294e+06	6814.42	73	0.000811665
P5, P6	32.2684	0.160856	7902.97	557.554	73
H7, H8	21.7968	0.0450409	1.99021e+06	51111.9	74	0.00103665
P7, P8	32.8432	0.374552	6195.88	988.405	74
H10, H9	14.8185	0.164024	1.06656e+08	9.96145e+06
H11, H12	18.4044	0.353949	1.39122e+07	2.7891e+06
H13, H14	19.7444	0.0917792	6.41817e+06	335753
H15, H16	23.6425	0.156778	695994	62140.8
H17, H18	25.3191	0.138725	267423	21133.2
H19, H20	29.0494	0.0708939	35886.8	1276.4
P10, P9	14.1679	0.169043	1.54585e+08	1.48783e+07
P11, P12	17.8176	0.177133	1.92937e+07	1.94554e+06
P13, P14	19.9172	0.280008	5.84904e+06	929989
P15, P16	24.9343	0.202015	333617	38347.4
P17, P18	25.7797	0.153777	205853	17883.2
P19, P20	28.8195	0.0135538	40282.2	276.423
A1, A2	19.9657	0.00901745	5.4453e+06	33408.7	75	0.000104476	0.958284
I1, I2	31.8344	0.25507	1706.89	294.746	75
A3, A4	27.352	0.0428526	37710.8	1123.83	76	0.869979	0.869979
I3, I4	23.0397	0.0405687	756973	21356.9	76
A5, A6	21.2898	0.120188	2.21561e+06	180979	77	0.000251887
I5, I6	31.8607	0.233944	1674.67	265.441	77
A7, A8	20.8248	0.011422	3.03512e+06	23586.9	78	0.000151729	0.79328
I7, I8	32.1886	0.570109	1381.75	522.926	78
A10, A9	26.2768	4.85013	386896	536961	79	0.000798721
I10, I9	32.7194	0.0205656	927.806	12.9819	79
A11, A12	21.2781	0.0100176	2.22962e+06	15196.7	80	0.000189121	0.679029
I11, I12	32.2635	0	1265.24	0	80
A13, A14	0	0	0	0	81	1	0.685829
I13, I14	33.053	1.19601	865.185	635.419	81
A15, A16	22.7134	0.277495	958503	183860	82	0.00720275	0.00720275
I15, I16	28.2078	0.1684	20861.8	2437.96	82
A17, A18	0	0	0	0	83	1	0.883318
I17, I18	20.8943	0.0500666	2.89566e+06	98620.8	83
A19, A20	26.7186	0	55033.8	0	84	0.560534	0.281281
I19, I20	24.7463	0.0192826	210585	2762.71	84
A21, A22	25.7363	0.0301057	107381	2199.4	85	0.821457	0.843521
I21, I22	21.8782	0.012327	1.48215e+06	12430.8	85
A23, A24	23.527	0.0147391	539283	5528.47	86	0.0154181	0.0154181
I23, I24	27.9236	0.0023451	25334.7	41.3239	86
B1, B2	25.2642	0.0127834	161077	1432.18	87	0.0377046	0.0377046
J1, J2	28.3453	0.131485	18934	1729.17	87
B3, B4	25.5695	0.00663559	130261	601.198	88	0.0934772	0.0934772
J3, J4	27.2574	0.0772741	40296.2	2164.77	88
B5, B6	22.9518	0.0374817	804660	20975.2	89	0.00802525	0.00802525
J5, J6	28.2978	0.0159371	19529.5	216.479	89
B7, B8	22.4701	0.0371688	1.12494e+06	29079.2	90	0.00464982	0.00464982
J7, J8	28.6087	0.133935	15765.6	1466.57	90
B10, B9	29.522	4.80486	41628.5	57726.6	91	0.382633	0.287975
J10, J9	26.2174	0.0307028	77402	1616.8	91
B11, B12	28.413	0	17375.5	0	92	0.84058	0.684762
J11, J12	24.3554	0.0589189	274849	11015.1	92
B13, B14	26.2447	0.0118572	81444.9	671.681	93	0.100662	0.100662
J13, J14	27.8138	0.028147	27348.2	535.373	93
B15, B16	24.7	0	217317	0	94	0.362398	0.472132
J15, J16	23.9158	0.0256606	370553	6469.21	94
B17, B18	26.6527	0.0863878	57606.2	3383.98	95	0.79318	0.783402
J17, J18	23.0616	0.0545623	662781	24599.1	95
B19, B20	26.2269	0.0579596	76927.1	3032.84	96	0.0922735	0.153182
J19, J20	27.9718	0.0105285	23459.7	168.051	96
B21, B22	26.3906	0.111796	68889.8	5235.02	97	0.446068	0.501164
J21, J22	25.0924	0.043767	166426	4955.19	97
B23, B24	26.1606	0.0292394	80452.3	1600.42	98	0.333474	0.458106
J23, J24	25.5682	0.164899	120755	13519.7	98
C1, C2	26.4643	0.177287	65666.6	7901.79	99	0.107739	0.16615
K1, K2	27.9517	0.0439617	23787.3	711.396	99
C3, C4	26.5753	0.0976667	60734.6	4032.92	100	0.240313	0.345254
K3, K4	26.6506	0.00362329	57637	142.089	100
C5, C6	26.1576	0.0922325	86620.7	5553.05	101	0.503327	0.503327
K5, K6	24.5575	0.0106791	263344	1956.03	101
C7, C8	26.1672	0.0118361	85957.4	707.635	102	0.825793	0.825793
K7, K8	22.3504	0.00983246	1.22239e+06	8359.73	102
C10, C9	26.4104	0.197154	72919.6	9968.19	103	0.533868	0.533868
K10, K9	24.6304	0.0870764	250548	15165.2	103
C11, C12	26.1276	0.0540845	82299.4	3027.8	104	0.21472	0.29605
K11, K12	26.4235	0.17561	67509.7	8047.11	104
C13, C14	26.3682	0.040299	69861.4	1915.29	105	0.632259	0.69901
K13, K14	23.9568	0.00409485	360340	1003.94	105
C15, C16	26.4588	0.154616	70379	7554.14	106	0.905506	0.905506
K15, K16	21.626	0.00980777	2.02325e+06	13802	106
C17, C18	26.5334	0.0524083	62442.5	2226.1	107	0.879868	0.886036
K17, K18	21.992	0.0434632	1.37202e+06	40567.4	107
C19, C20	26.4534	0.106855	70537.2	5237.64	108	0.98288	0.98288
K19, K20	19.05	0.0841244	1.21492e+07	710468	108
C21, C22	26.2329	0.036954	76594.6	1925.61	109	0.617739	0.667159
K21, K22	23.9127	0.0300454	371334	7590.48	109
C23, C24	28.4262	0.173979	17926.4	2163.99	110	0.973384	0.973384
K23, K24	21.6675	0.0677316	1.96674e+06	92619.5	110
D1, D2	26.8289	0.0154048	54251.7	581.278	111	0.928699	0.928699
L1, L2	21.5591	0.0333111	2.11989e+06	49111.8	111
D3, D4	26.4675	0.15113	65457	6718.93	112	0.447608	0.523249
L3, L4	25.1583	0.0385137	159121	4169.17	112
D5, D6	26.3743	0.0539206	74450.4	2791.54	113	0.899001	0.899001
L5, L6	21.6525	0.0884505	1.98807e+06	122231	113
D7, D8	26.7238	0.00202438	54838.7	75.5328	114	0.735533	0.805491
L7, L8	23.6057	0.0100386	457551	3125.12	114
D10, D9	26.6657	0.363885	57925.6	14196.7	115	0.801673	0.820282
L10, L9	22.9769	0.0846842	702439	40450.8	115
D11, D12	26.3189	0.210811	72603.7	10378.2	116	0.707938	0.809139
L11, L12	23.3983	0.131844	527958	47297	116
D13, D14	26.7243	0.513195	56498.2	19336.2	117	0.822644	0.850724
L13, L14	22.8107	0.0575661	786181	30784.7	117
D15, D16	26.4474	0.134761	66323.7	6072.7	118	0.559057	0.604282
L15, L16	24.4808	0.00147735	252269	253.573	118
D17, D18	26.3717	0.454396	71354.1	21715.3	119	0.551139	0.612155
L17, L18	24.4223	0.102547	262839	18323.8	119
D19, D20	26.3399	0.128926	71341.1	6250	120	0.819904	0.850176
L19, L20	22.4947	0.00300748	974361	1993.78	120
D21, D22	26.8404	0.173973	50833.7	6003.14	121	0.619954	0.729093
L21, L22	24.504	0.125772	248769	21262.2	121
D23, D24	26.2987	0.106567	78549	5816.88	122	0.91446	0.91446
L23, L24	21.3108	0.021307	2.51918e+06	37332.7	122
E1, E2	26.8318	0.0558337	54159.4	2102.74	123	0.966085	0.966085
M1, M2	20.4451	0.226043	4.62824e+06	724681	123
E3, E4	26.293	0.0942395	73592.4	4715.47	124	0.679688	0.733816
M3, M4	23.5711	0.0159243	468479	5075.73	124
E5, E6	26.449	0.0667772	66145	3004.22	125	0.390237	0.486616
M5, M6	25.4896	0.00531427	126995	459.181	125
E7, E8	26.6466	0.0829612	57840.1	3263.1	126	0.767658	0.877742
M7, M8	28.6279	9.01157	573311	810506	126
E10, E9	26.5805	0.0453411	60469.3	1865.15	127	0.697901	0.738735
M10, M9	23.7348	0.00803845	419083	2292.06	127
E11, E12	26.2782	0.0462012	74277.4	2334.5	128	0.895113	0.892993
M11, M12	21.5136	0.0984915	1.90166e+06	127339	128
E13, E14	26.7367	0.140201	54481.7	5189.2	129	0.696628	1
M13, M14	23.8969	0.0105792	375317	2701.49	129
E15, E16	27.0512	0.434974	44852.9	13083.8	130	0.8688	0.858778
M15, M16	22.6299	0.149113	891046	90246.2	130
E17, E18	26.3465	0.0344091	70894.5	1659.6	131	0.830355	0.845513
M17, M18	22.3978	0.0454226	1.04101e+06	32167.3	131
E19, E20	26.7927	0.0673056	52355	2396.7	132	0.888948	0.891314
M19, M20	22.1214	0.0877294	1.25727e+06	75002	132
E21, E22	26.9949	0.00606666	45602	188.23	133	0.831313	0.834567
M21, M22	23.0407	0.166365	674197	76151.6	133
E23, E24	26.6369	0.0599542	58201.3	2373.49	134	0.83268	0.864274
M23, M24	22.6631	0.00437394	868930	2585.91	134
F1, F2	25.74	0.644066	112278	47685.2	135	0.592762	0.737209
N1, N2	23.5043	0.0281727	490283	9397.34	135
F3, F4	26.5337	0.0464209	62427.1	1971.38	136	0.710773	0.748635
N3, N4	23.5971	0.011949	460241	3741.71	136
F5, F6	26.3067	0.119152	72951.3	5907.65	137	0.805287	0.837233
N5, N6	22.6045	0.0922622	905129	56781.3	137
F7, F8	26.6229	0.0342422	62615	1491.16	138	0.913051	0.913051
N7, N8	21.6632	0.066313	1.97256e+06	90949.3	138
F10, F9	26.5584	0.209288	61679	8753.32	139	0.734829	0.750601
N10, N9	23.4438	0.179757	512765	62557.6	139
F11, F12	26.5667	0.0303587	65107.8	1374.7	140	0.93558	0.93558
N11, N12	21.1403	0.0321699	2.83669e+06	63467.1	140
F13, F14	26.4029	0.361465	74114.6	18439.6	141	0.913286	0.913286
N13, N14	21.4162	0.0537263	2.34177e+06	87489.1	141
F15, F16	26.6699	0.0260182	60595.7	1096.53	142	0.915544	0.915544
N15, N16	21.6639	0.0242983	1.97066e+06	33303.7	142
F17, F18	26.3847	0.314389	69862.1	14831	143	0.767676	0.825876
N17, N18	22.9965	0.0053621	692542	2526.6	143
F19, F20	26.7941	0.235609	52612.9	8398.2	144	0.776312	0.743566
N19, N20	23.3416	0.0501579	547781	18690.4	144
F21, F22	26.6409	0.0657964	58047.5	2597.75	145	0.75608	0.776513
N21, N22	23.3628	0.000700691	539791	257.341	145
F23, F24	26.4095	0.105469	67998.4	4875.36	146	0.612686	0.653022
N23, N24	24.1256	0.198344	322697	43416.5	146
G1, G2	26.5099	0.016366	63428.5	706.276	147	0.801866	0.827519
O1, O2	22.8407	0.0302654	770100	15857	147
G3, G4	26.6133	0.139721	59252.5	5624.34	148	0.875387	0.893788
O3, O4	22.1302	0.0253071	1.24872e+06	21500.2	148
G5, G6	26.4817	0.124449	64773.5	5478.04	149	0.690862	0.863424
O5, O6	23.6832	0.0651855	434267	19254	149
G7, G8	26.4434	0.0378612	66376.1	1709.68	150	0.727451	0.766452			Error: 0.0297
O7, O8	23.3887	0.135099	531486	48785.4	150					Efficiency: 2.005
G10, G9	26.3145	0.172437	72695.1	8509.34	151	0.460999	0.521758			Slope: -3.310
O10, O9	24.925	0.0513042	186525	6509.65	151					YIntercept: 41.90
G11, G12	26.2613	0.184692	75412.9	9451.67	152	0.754822	0.799957			Link: 0.000
O11, O12	22.9891	0.0769846	696514	36466.3	152
G13, G14	26.6964	0.236054	56228.8	8992.19	153	0.713906	0.857673
O13, O14	24.3028	1.95953	420932	438417	153
G15, G16	30.4327	0.332372	4482.95	1027.23	154	0.955281	0.955281
O15, O16	24.4541	0.354919	287289	70209	154
G17, G18	26.5259	0.0882732	62797.9	3769.38	155	0.54672	0.564855
O17, O18	24.637	0.122991	227230	18992.7	155
G19, G20	26.1576	0.373274	81910.3	20582.1	157	0.465005	0.580172
O19, O20	24.7255	0.0200695	213584	2916.41	157
G21, G22	26.5955	0.151558	59997.8	6175.92	158	0.626252	0.662377
O21, O22	24.2219	0.146375	301597	29987	158
G23, G24	26.5905	0.243135	60454	9955.3	159	0.82014	0.86648
O23, O24	22.737	0.0841969	826987	47349.3	159
H1, H2	26.3544	0.34755	71495.2	16750.5	160	0.450679	0.534881
P1, P2	25.0113	0.0824811	175970	9870.11	160
H3, H4	26.3907	0.0207498	68792.2	971.168	161	0.854862	0.498499
P3, P4	22.1703	0.0617181	1.21555e+06	51028.8	161
H5, H6	26.5663	0.0894709	61098.1	3717.05	162	0.655925	0.703599
P5, P6	24.0034	0.0915576	349423	21753.1	162
Experiment: 20160808 result Active filter: SYBR Green I / HRM Dye (465-510)
H10, H9	14.9566	0.319677	2.11845e+08	4.67192e+07
H11, H12	18.9245	0.400995	1.35039e+07	3.71828e+06
H13, H14	20.0427	0.229375	6.12434e+06	972955
H15, H16	23.7502	0.234116	464791	75352.7
H17, H18	24.9911	0.171421	195463	23250.1
H19, H20	26.6162	0.0490328	62917.8	2145.36
H21, H22	0	0	0	0
H23, H24	0	0	0	0
H7, H8	27.1836	0.0135942	42388.5	400.791
P10, P9	15.4689	0	1.46523e+08	0
P11, P12	17.3577	0.61876	4.12244e+07	1.72138e+07
P13, P14	20.2846	0.193303	5.16634e+06	692530
P15, P16	24.422	0.133696	289992	26927.9
P17, P18	25.0908	0.0863819	181894	10922
P19, P20	27.5746	0.229643	32500.3	5169.2
P7, P8	28.7232	0.00538414	14526.9	54.4017
Samples	MeanCp	STD Cp	Mean conc	STD conc
35	0	253.759	0	163	0.995469
24.758	0.0333645	167261	3536.41	163
35	0	253.759	0	164	0.992323
25.5961	0.0904208	98407.4	5636.05	164
35	0	253.759	0	165	0.998625
22.8714	0.00384616	552854	1347.58	165
35	0	253.759	0	166	0.980787
27.0641	0.143066	38862.1	3518.71	166
35	0	253.759	0	167	0.999092
22.2163	0.016093	837386	8540.28	167
35	0	253.759	0	168	0.981608
27.0015	0.260933	40629.8	6688.3	168
0	0	0	0	169	1
24.0021	0.0560777	270105	9597.24	169
0	0	0	0	170	1
22.8551	0.0188494	558597	6672.69	170
35	0	253.759	0	171	0.997432
23.8592	0.0431915	295672	8092.28	171
35	0	253.759	0	172	0.994752
24.9926	0.102329	144291	9350.81	172
35	0	253.759	0	173	0.992102
25.64	0.0156714	95631.4	949.766	173
35	0	253.759	0	174	0.993865
25.2534	0.303744	123318	23592.8	174
22.2304	0.000930751	1.16632e+06	738.594	175	0.000404058
32.1	0.0401701	1414.35	38.651	175
23.9193	0.0645873	284688	11649.6	176	0.00996057
29.4456	0.147081	8592.55	799.77	176
23.4008	0.0562715	395403	14097.8	177	0.000213879
35	0	253.759	0	177
22.9954	0.131244	511970	42534.2	178	0.00187542
31.1743	0.258419	2885.88	470.526	178
23.3206	0.0179917	415894	4742	179	0.000203343
35	0	253.759	0	179
22.9229	0.24421	538298	82979.8	180	0.00882425
28.6347	0.173287	14377.1	1575.73	180
22.6794	0.00114682	624392	453.805	181	0.0119176
27.9171	0.0521941	22593	747.191	181
24.1462	0.0813175	246617	12703.7	182	0.000342869
35	0	253.759	0	182
23.1141	0.0146996	452832	3526.29	183	0.000613776
35	0	834.324	0	183
28.6673	0.583004	14523	5247.08	184	0.00579058
35	0	253.759	0	184
23.4869	0.153087	375159	36340.3	185	0.000225417
35	0	253.759	0	185
24.1847	0.0828955	240690	12638.8	186	0.00035131
35	0	253.759	0	186
23.2988	0.296717	425393	79524.3	187	0.0017671
31.6524	0.812327	2259.12	1114.23	187
23.0836	0.146538	484333	44914.6	188	0
0	0	0	0	188
23.7521	0.0413938	316439	8300.25	189	0.000267236
35	0	253.759	0	189
22.467	7.36528e-05	714360	33.3444	190	0.000118395
35	0	253.759	0	190
22.1301	0.0942863	885144	52859.1	191	9.55532e-05
35	0	253.759	0	191
25.8339	0.526012	109288	30066.1	192	0.00253826
35	0	834.324	0	192
23.3157	0.0307419	417231	8128.24	193	0.000202692
35	0	253.759	0	193
22.5637	0.0226875	929728	14351	194	0.000435125
32.3311	0.204171	1214.17	168.127	194
25.7727	0.0681778	87958.5	3799.28	195	0.711227
22.6162	0.00402369	649905	1657.26	195
23.274	0.178503	429734	48510.5	196	0.0228514
27.4635	0.112706	30149	2151.63	196
0	0	0	0	197	0
0	0	0	0	197
22.8697	0.0704314	553713	24707.2	198	0.000152739
35	0	253.759	0	198
23.5678	0.0346604	355623	7810.95	199	0.00303066
30.9797	0.0220536	3243.14	45.326	199
22.4722	0.081551	712459	36805.4	200	0.000164428
34.5494	0.637303	351.503	138.23	200
22.4313	0.197888	733562	91756.3	201	0.000134471
34.7734	0.320422	295.967	59.6914	201
29.1701	0.555754	10527.7	3633.14	202	0.655037
26.3763	0.000162123	59972.2	6.16182	202
34.6383	0	319.136	0	203	0.994564
24.6849	0.00678884	175182	753.7	203
31.073	0.573936	3158.4	1124.13	204	0.916694
25.5065	0.135679	104265	8954.3	204
35	0	253.759	0	205	0.989789
26.051	0.108682	73790.2	5078.44	205
34.5867	0.58449	341.118	123.544	206	0.993643
24.8285	0.0361448	159957	3663.77	206
35	0	253.759	0	207	0.995674
24.6852	0.0690223	175228	7662.48	207
35	0	253.759	0	208	0.986316
26.5166	0.00787627	54869.5	273.883	208
35	0	253.759	0	209	0.993477
25.3408	0.172734	115945	12667.2	209
35	0	253.759	0	210	0.991967
25.6709	0.156304	94006.6	9296.84	210
0	0	0	0	211	1
25.4127	0.169387	110770	11868.1	211
35	0	253.759	0	212	0.976475
27.3878	0.0563204	31599.6	1127.64	212
35	0	253.759	0	213	0.977617
27.3073	0.0447791	33250.4	943.475	213
0	0	0	0	214	1
27.9425	0.0758072	22240.2	1068.06	214
0	0	0	0	215	1
25.965	0.0571589	77855.1	2819.63	215
35	0	253.759	0	216	0.989828
26.0431	0.0287321	74076	1348.77	216
35	0	253.759	0	217	0.998075
23.4034	0.00430879	394631	1077.61	217
0	0	0	0	218	1
26.5792	0.0485084	52748.8	1621.35	218
35	0	253.759	0	219	0.996275
24.45	0.123223	203607	15883.9	219
34.1209	1.24328	513.536	367.38	220	0.990747
24.7803	0.0623103	164958	6512.35	220
35	0	253.759	0	221	0.99603
24.5484	0.0233111	191019	2821.88	221
34.2593	1.04747	451.298	279.362	222	0.989115
25.2643	0.372296	123029	28761.3	222
35	0	253.759	0	223	0.991069
25.8357	0.00973338	84475.4	521.083	223
