# Supplementary material for: Specificity trumps flexibility—location-based stable associations between Symbiodiniaceae genera and Platygyra verweyi (Scleractinia; Merulinidae)
Source: PeerJ. 2020 May 5;8:e8791. doi: 10.7717/peerj.8791 (PMC7207216; doi:10.7717/peerj.8791)
Supplement: Supplemental Information 3 [file peerj-08-8791-s003.xlsx]

## Sheet: 2015 rte 3 biomonthly
QPCR
Samples	MeanCp	STD Cp	Mean conc	STD conc
F3, F4	23.3653	0.0469533	404352	12030.3	1	0.000897578
N3, N4	32.7626	0.630727	1089.79	424.372	1
F5, F6	24.3143	0.00662807	221554	930.638	2	0.000381642
N5, N6	35	0	253.759	0	2
F7, F8	22.4407	0.12255	727471	56442.9	3	0.000116261
N7, N8	35	0	253.759	0	3
F10, F9	23.5408	0.0324731	361758	7444.35	4	0.000233766
N10, N9	35	0	253.759	0	4
F11, F12	23.3966	0.0471108	396418	11833.8	5	0.000213331
N11, N12	35	0	253.759	0	5
F13, F14	23.5184	0.0267516	366908	6220.16	6	0.000230486
N13, N14	35	0	253.759	0	6
F15, F16	22.6322	0.027867	643418	11362.6	7	0.000131447
N15, N16	35	0	253.759	0	7
F17, F18	24.1522	0.00689853	245526	1073.42	8	0.000344392
N17, N18	35	0	253.759	0	8
F19, F20	24.2369	0.050083	232753	7386.33	9	0.000363285
N19, N20	35	0	253.759	0	9
F21, F22	23.9457	0.049359	279917	8754.69	10	0.000396616
N21, N22	34.5703	0	333.191	0	10
F23, F24	23.8085	0.0206884	305291	4002.62	11	0.0174123
N23, N24	28.4401	0.0953346	16230.1	979.991	11
G1, G2	24.8766	0.0960785	155284	9449.3	12	0.000544426
O1, O2	35	0	253.759	0	12
G3, G4	22.9651	0.0421202	521073	13907.7	13	0.000162305
O3, O4	35	0	253.759	0	13
G5, G6	32.6539	0.889285	1212.74	649.456	14	0.718364
O5, O6	29.3263	0.187642	9279.93	1100.95	14
G7, G8	32.0742	0.606322	1680.83	630.428	15	0.989157
O7, O8	23.1647	0.142626	460019	41524	15
G10, G9	32.8021	0.23443	1027.43	152.085	16	0.989605
O10, O9	23.8716	0.062754	293422	11666.4	16
G11, G12	34.0204	1.38535	566.04	441.632	17	0.995905
O11, O12	23.3316	0.0194318	413006	5085.96	17
G13, G14	32.7828	1.63599	1324.99	1171.1	18	0.977275
O13, O14	24.7239	0.0488825	170944	5294.84	18
G15, G16	32.4549	0.966912	1394.65	804.862	19	0.984933
O15, O16	23.9835	0.101431	273509	17569.5	19
G17, G18	32.6826	2.0662	1609.41	1658.52	20	0.973813
O17, O18	24.6461	0.0161252	179544	1834.78	20
G19, G20	34.5101	0.692891	362.977	154.457	21	0.996509
O19, O20	23.7806	0.0603901	310838	11893.5	21
G21, G22	35	0	253.759	0	22	0.99856
O21, O22	22.9447	0.0240463	527798	8042.96	22
G23, G24	22.8528	0.0352615	559468	12501.3	23	0.00191902
O23, O24	31.0124	0.397754	3227.09	804.963	23
H1, H2	23.6003	0.0277013	348348	6115.15	24	0.000351606
P1, P2	34.4161	0.0708088	367.573	16.4892	24
H3, H4	22.7618	0.0224558	592656	8433.97	25	0.000142704
P3, P4	35	0	253.759	0	25
H5, H6	22.7849	0.0197301	584023	7302.37	26	0.000250943
P5, P6	34.2878	1.00713	439.78	263.073	26
H7, H8	22.0339	0.00594749	939962	3542.9	27	0.000443017
P7, P8	32.51	0.404255	1249.81	316.738	27
A1, A2
I1, I2	A1, A2	24.4389	0.0989441	149121	9198.68	28	0
A3, A4	I1, I2	35	0	112.851	0	28
I3, I4	A3, A4	23.7732	0.00608226	225152	844.544	29	0
A5, A6	I3, I4	34.0446	1.35112	282.633	240.109	29
I5, I6	A5, A6	22.7759	0.056619	414374	14215.6	30	0
A7, A8	I5, I6	32.7697	0.627214	596.53	258.232	30
I7, I8	A7, A8	24.0525	0.0412303	189480	4840.78	31	0
A10, A9	I7, I8	33.7392	0	283.337	0	31
I10, I9	A10, A9	25.7132	0.116588	66789.4	4959.41	32	0
A11, A12	I10, I9	35	0	112.851	0	32
I11, I12	A11, A12	23.9864	0.182605	197970	22329.3	33	0
A13, A14	I11, I12	35	0	112.851	0	33
I13, I14	A13, A14	23.6683	0.0284517	438508	8488.19	34	0
A15, A16	I13, I14	32.9402	0.179712	801.362	97.7421	34
I15, I16	A15, A16	24.7992	0.119134	119070	8895.78	35	0
A17, A18	I15, I16	35	0	112.851	0	35
I17, I18	A17, A18	34.1475	1.20556	251.57	196.178	36	0.99
A19, A20	I17, I18	25.672	0.0249922	68478.2	1090.2	36
I19, I20	A19, A20	35	0	112.851	0	37	1
A21, A22	I19, I20	23.7569	0.0568194	227491	7967.69	37
I21, I22	A21, A22	33.5437	0.0265582	326.351	6.25153	38	1
A23, A24	I21, I22	23.3952	0.0806865	284216	14044.1	38
I23, I24	A23, A24	33.9922	1.42521	300.253	265.027	39	1
B1, B2	I23, I24	22.5532	0.0422356	474073	12085.4	39
J1, J2	B1, B2	32.8651	0.00665351	531.082	2.52315	40	0.98
B3, B4	J1, J2	25.1285	0.13116	96811.3	8006.01	40
J3, J4	B3, B4	34.3613	0.90332	199.817	122.989	41	1
B5, B6	J3, J4	22.6915	0.0615094	436115	16229	41
J5, J6	B5, B6	34.6273	0.527035	153.861	57.9979	42	1
B7, B8	J5, J6	24.5925	0.028307	135365	2396.59	42
J7, J8	B7, B8	34.7454	0.360055	138.429	36.1731	43	1
B10, B9	J7, J8	24.6986	0.0676594	126711	5370.54	43
J10, J9	B10, B9	33.9952	0	235.364	0	44	0.98
B11, B12	J10, J9	26.5861	0.0722965	38098.4	1780.97	44
J11, J12	B11, B12	24.5537	0.0620478	138732	5379.24	45	0
B13, B14	J11, J12	31.1483	0	1781.14	0	45
J13, J14	B13, B14	24.9959	0.0648518	105118	4292.26	46	0.01
B15, B16	J13, J14	30.8084	0.437664	2305.67	687.857	46
J15, J16	B15, B16	22.7428	0.0149372	422659	3823.81	47	0
G21, G22	J15, J16	35	0	112.851	0	47
O21, O22	B17, B18	24.6134	0.0868599	133689	7262.3	48	0
B19, B20	J17, J18	35	0	112.851	0	48
J19, J20	B19, B20	24.1057	0.0739704	183393	8411.43	49	0
B21, B22	J19, J20	35	0	112.851	0	49
J21, J22	B21, B22	23.3656	0.0181166	289243	3208.7	50	0
B23, B24	J21, J22	35	0	112.851	0	50
J23, J24	B23, B24	24.2262	0.53451	309959	110303	51	0
C1, C2	J23, J24	31.6644	0.0228044	1902.03	29.5103	51
K1, K2	C1, C2	24.6208	0.0186989	132984	1556.08	52	0
C3, C4	K1, K2	35	0	112.851	0	52
K3, K4	C3, C4	24.1228	0.0394645	181388	4441.02	53	0
C5, C6	K3, K4	35	0	112.851	0	53
K5, K6	C5, C6	24.9966	0.0224662	105034	1486.12	54	0
C7, C8	K5, K6	35	0	112.851	0	54
K7, K8	C7, C8	24.6602	0.0538366	129771	4374.15	55	0
C10, C9	K7, K8	33.2724	0.250529	399.86	71.5824	55
K10, K9	C10, C9	23.9982	0.0753666	350541	17967.3	56	0
H1, H2	K10, K9	34.1805	0.405199	349.866	95.2516	56
P1, P2	C11, C12	24.3383	0.169755	159056	16783.6	57	0
C13, C14	K11, K12	35	0	112.851	0	57
K13, K14	C13, C14	33.585	0.21883	318.674	50.1243	58	0
C15, C16	K13, K14	0	0	0	0	58
K15, K16	C15, C16	33.7925	0.76384	293.275	154.394	59	1
C17, C18	K15, K16	23.2256	0.0835438	315301	16083.6	59
K17, K18	C17, C18	33.0738	0.233886	460.574	76.8014	60	0.99
C19, C20	K17, K18	23.8437	0.039477	215599	5254.87	60
K19, K20	C19, C20	33.6382	0.648386	321.3	145.211	61	1
C21, C22	K19, K20	22.9621	0.0429981	370054	9673.58	61
K21, K22	C21, C22	32.7394	0.85907	634.931	366.152	62	0.98
C23, C24	K21, K22	24.7753	0.0981209	120821	7433.65	62
K23, K24	C23, C24	33.7648	1.74685	393.646	397.104	63	1
D1, D2	K23, K24	22.8577	0.0375846	394267	8992.64	63
L1, L2	D1, D2	33.0586	1.85876	676.607	704.052	64	0.99
D3, D4	L1, L2	24.5653	0.336741	139166	29083.9	64
L3, L4	D3, D4	35	0	112.851	0	65	0.25
D5, D6	L3, L4	35	0	112.851	0	65
L5, L6	D5, D6	31.6956	0.408843	1239.7	350.772	66	0.94
D7, D8	L5, L6	25.8373	0.0612647	61643.5	2411.9	66
L7, L8	D7, D8	25.5902	0.0624686	72160.7	2866.95	67	0.01
D10, D9	L7, L8	30.932	0.360052	2101.55	519.259	67
L10, L9	D10, D9	26.0105	0.0980772	55212.2	3466.97	68	0.01
D11, D12	L10, L9	31.5457	0.0617053	1350.42	58.3056	68
L11, L12	D11, D12	23.6666	0.153029	240945	22663.6	69	0
D13, D14	L11, L12	33.6662	1.18811	354.117	271.474	69
L13, L14	D13, D14	23.7613	0.054144	226864	7572.32		0
D15, D16	L13, L14	33.7672	1.74345	392.495	395.477
L15, L16	D15, D16	24.3401	0.14594	158770	14410.6	70	0
D17, D18	L15, L16	35	0	112.851	0	70
L17, L18	D17, D18	24.8304	0.00991557	116606	726.137	71	0
D19, D20	L17, L18	35	0	112.851	0	71
L19, L20	D19, D20	23.3358	0.0705745	294692	12724.9	72	0
D21, D22	L19, L20	35	0	112.851	0	72
L21, L22	D21, D22	25.2854	0.0582404	87553.7	3226.55	73	0
D23, D24	L21, L22	35	0	112.851	0	73
L23, L24	D23, D24	23.4326	0.0565951	277688	9632.88	74	0
E1, E2	L23, L24	35	0	112.851	0	74
M1, M2	E1, E2	23.4878	0.0480992	268422	7921.69	75	0
E3, E4	M1, M2	35	0	112.851	0	75
M3, M4	E3, E4	24.8784	0.395302	114844	28244.6	76	0
E5, E6	M3, M4	35	0	112.851	0	76
M5, M6	E5, E6	26.9984	0.072629	29154.4	1378.47	77	0
E7, E8	M5, M6	35	0	112.851	0	77
M7, M8	E7, E8	25.6189	0.0937747	70889.9	4228.57	78	0
E10, E9	M7, M8	35	0	112.851	0	78
M10, M9	E10, E9	23.7432	0.133548	229735	18889.9	79	0
E11, E12	M10, M9	35	0	112.851	0	79
M11, M12	E11, E12	34.2324	1.08549	229.124	164.435	80	0.97
E13, E14	M11, M12	27.5565	0.0853991	20240.2	1135.41	80
M13, M14	E13, E14	32.6247	0.427916	644.702	193.305	81	1
E15, E16	M13, M14	22.2512	0.000255173	568506	87.1007	81
M15, M16	E15, E16	33.1736	0.209784	428.228	64.2021	82	0.99
E17, E18	M15, M16	24.7223	0.0252112	124797	1972.24	82
M17, M18	E17, E18	35	0	112.851	0	83	1
E19, E20	M17, M18	22.8663	0.0889455	392423	21176.7	83
M19, M20	E19, E20	30.1768	0.052693	3484.71	125.803	84	0.93
E21, E22	M19, M20	24.664	0.0600645	129475	4869.09	84
M21, M22	E21, E22	30.487	0.226253	2831.69	439.393	85	0.91
E23, E24	M21, M22	25.2274	0.000696358	90797.6	39.9777	85
M23, M24	E23, E24	34.4302	0.805801	186.192	103.72	86	1
F1, F2	M23, M24	24.6279	0.591511	136825	49527.2	86
N1, N2	F5, F6	34.2586	1.04857	222.745	155.415	87	0.99
Experiment: 20160809 ths Active filter: SYBR Green I / HRM Dye (465-510)	N5, N6	24.6888	0.221522	128031	17712.2	87
H10, H9	F7, F8	33.1498	1.21789	516.388	401.235	88	0.98
H11, H12	N7, N8	25.1247	0.110236	96997.8	6743.56	88
H13, H14	F10, F9	25.8393	0.0579275	61561.8	2277.64	89	0
H15, H16	N10, N9	32.9501	0.696128	530.371	253.586	89
H17, H18	F11, F12	24.5137	0.141553	142455	12579.5	90	0
H19, H20	N11, N12	34.1433	0.64463	222.824	100.86	90
H21, H22	F13, F14	26.0508	0.0843176	53788.8	2906.18	91	0
H23, H24	N13, N14	35	0	112.851	0	91
P10, P9	F15, F16	24.9761	0.0994372	180307	12189.5	92	0
P11, P12	N15, N16	34.5614	0.620264	276.83	113.479	92
P13, P14	F17, F18	24.4955	0.110924	143980	9964.96	93	0
P15, P16	N17, N18	35	0	112.851	0	93
P17, P18	F19, F20	24.0636	0.0129812	188152	1513.86	94	0
P19, P20	N19, N20	31.2825	0.685198	1713.55	788.729	94
Samples	F21, F22	24.6759	0.0153454	128470	1234.83	95	0
	N21, N22	33.9151	0.842629	272.591	156.945	95
	F23, F24	24.141	0.15372	179728	17121.3	96	0
	N23, N24	35	0	112.851	0	96
	G1, G2	25.6083	0.0725488	71343.3	3292.55	97	0
	O1, O2	35	0	112.851	0	97
	G3, G4	24.8188	0.18176	117829	13418.6	98	0.01
	O3, O4	29.7369	0.319079	4758.72	1025.33	98
	F1, F2	26.8427	0.0289252	32245.7	605.835	99	0
	N1, N2	35	0	112.851	0	99
	F3, F4	27.7167	0.751307	19298.5	9181.95	100	0
	N3, N4	35	0	112.851	0	100
	G5, G6	25.2756	0.103143	88159.5	5749.96	101	0
	O5, O6	34.4045	0	174.69	0	101
	G7, G8	33.1671	1.63611	579.66	557.757	102	0.93
	O7, O8	27.4556	0.491035	22160.3	7018.74	102
	G10, G9	32.4979	0	689.796	0	103	0.98
	O10, O9	25.1629	0.00849312	94574.3	507.312	103
	G11, G12	33.7359	1.78773	407.778	417.091	104	0.99
	O11, O12	25.3154	0.924889	93134.6	51627.3	104
	G13, G14	32.8065	1.07683	635.507	445.262	105	0.99
	O13, O14	23.9043	0.02326	207658	2985.46	105
	G15, G16	32.6483	1.27346	748.303	598.457	106	0.98
	O15, O16	24.9513	0.0227959	108076	1550.42	106
	G17, G18	31.6447	0.10964	1261.18	96.8345	107	0.97
	O17, O18	24.7185	0.0848284	125172	6652.65	107
	G19, G20	33.563	0.583816	335.872	137.442	108	1
	O19, O20	23.8329	0.0368628	217035	4938.71	108
	G21, G22	30.9331	0.317769	2092.84	457.425	109	0.94
	O21, O22	25.1018	0.118584	98429.5	7357.56	109
	G23, G24	32.5029	0.291991	694.593	143.012	110	0.98
	O23, O24	25.0498	0.0305313	101577	1954.87	110
	H1, H2	25.835	0.0703871	61741.3	2775.1	111	0
	P1, P2	33.1348	0	437.867	0	111
	H3, H4	27.0279	0.424011	29116.3	7943.15	112	0.29
	P3, P4	26.6621	0.178854	36369.5	4203.42	112
	H5, H6	27.1791	0.154039	25962.2	2607.78	113	0.01
	P5, P6	32.6026	0.129743	641.643	59.1264	113
	H7, H8	24.9569	0.0613006	182546	7611.44	114	0
	P7, P8	33.2987	0.792304	671.578	345.458	114
	H7, H8	23.5876	0.0259395	463266	8175.73	115	0.000749952
	P7, P8	32.6975	0.95584	1043.06	634.257	115
	A1, A2	24.9031	0.0205684	175535	1912.64	116	0
	I1, I2	0	0	0	0	116
	A3, A4	23.4785	0.0638306	373444	12625.5	117	0
	I3, I4	35	0	834.324	0	117
	A5, A6	24.9004	0.0540792	175817	5036.28	118	0
	I5, I6	35	0	834.324	0	118
	A7, A8	25.6948	0.0332181	115403	2030.71	119	0
	I7, I8	35	0	834.324	0	119
	A10, A9	25.4685	0.0897176	130167	6184.33	120	0
	I10, I9	35	0	834.324	0	120
	A11, A12	25.26	0.0658648	145332	5069.96	121	0
	I11, I12	35	0	834.324	0	121
	A13, A14	24.1641	0.0147592	259641	2030.06	122	0
	I13, I14	35	0	834.324	0	122
	A15, A16	31.5108	0.258722	5322.83	727.274	123	0.49
	I15, I16	29.5287	0.418909	15327.1	3373.76	123
	A17, A18	35	0	834.324	0	124	0.98
	I17, I18	25.6131	0.0204402	120502	1304.82	124
	A19, A20	34.5299	0.664785	1103.61	380.824	125	0.99
	I19, I20	23.9216	0.060461	295308	9457.01	125
	A21, A22	35	0	834.324	0	126	0.99
	I21, I22	23.6048	0.0466624	349226	8631.92	126
	A23, A24	35	0	834.324	0	127	0.98
	I23, I24	25.765	0.276512	111782	16316	127
	B1, B2	35	0	834.324	0	128	0.98
	J1, J2	25.2272	0.0469897	147856	3680.23	128
	B3, B4	35	0	834.324	0	129	0.99
	J3, J4	24.9315	0.110882	173054	10159.5	129
	B5, B6	35	0	834.324	0	130	0.98
	J5, J6	25.9434	0.0369363	101168	1979.46	130
	B7, B8	24.8564	0.129308	180137	12330.1	131	0
	J7, J8	35	0	834.324	0	131
	B10, B9	25.1001	0.12584	158304	10545.5	132	0
	J10, J9	35	0	834.324	0	132
	B11, B12	22.84	0.0165549	523611	4592.05	133	0
	J11, J12	35	0	834.324	0	133
	B13, B14	25.7617	0.117962	111490	6962.66	134	0
	J13, J14	35	0	834.324	0	134
	B15, B16	27.3477	0.120877	48123.4	3079.51	135	0.01
	J15, J16	35	0	834.324	0	135
	B17, B18	24.2427	0.0197733	249057	2608.85	136	0
	J17, J18	35	0	834.324	0	136
	B19, B20	24.1539	0.0535032	261090	7399.3	137	0
	J19, J20	35	0	834.324	0	137
	B21, B22	23.911	0.0215558	296903	3390.37	138	0
	J21, J22	35	0	834.324	0	138
	B23, B24	24.6773	0.023494	197834	2462.22	139	0
	J23, J24	35	0	834.324	0	139
	C1, C2	26.0216	0.0197981	97055.3	1017.92	140	0
	K1, K2	35	0	834.324	0	140
	C3, C4	25.9984	0.0940406	98313.4	4895.83	141	0
	K3, K4	35	0	834.324	0	141
	C5, C6	24.7676	0.0266233	188601	2659.93	142	0
	K5, K6	35	0	834.324	0	142
	C7, C8	24.4312	0.0243223	225390	2904.06	143	0
	K7, K8	35	0	834.324	0	143
	C10, C9	33.7619	0.536205	1640.2	459.749	144	0.81
	K10, K9	28.8995	0.331672	21292.9	3722.16	144
	C11, C12	34.7244	0.389739	975.779	200.048	145	1
	K11, K12	22.2609	0.0441059	711685	16627.4	145
	C13, C14	35	0	834.324	0	146	0.99
	K13, K14	24.7105	0.02215	194387	2280.91	146
	C15, C16	35	0	834.324	0	147	0.99
	K15, K16	24.0632	0.358143	276360	52121.4	147
	C17, C18	35	0	834.324	0	148	0.99
	K17, K18	23.6774	0.039919	336036	7105.77	148
	C19, C20	35	0	834.324	0	149	0.99
	K19, K20	23.728	0.0608932	327197	10553.1	149
	C21, C22	35	0	834.324	0	150	0.98
	K21, K22	25.6145	0.0229852	120415	1466.21	150
	C23, C24	35	0	834.324	0	151	1
	K23, K24	21.5936	0.0104366	1.01338e+06	5602.85	151
	D1, D2	0	0	0	0	152	1
	L1, L2	25.879	0.12135	104779	6731.21	152
	D3, D4	23.5565	0.0418167	358268	7935.99	153	0
	L3, L4	32.5548	0.518149	3104.87	841.725	153
	D5, D6	25.6905	0.384281	116858	23626.5	154	0
	L5, L6	35	0	834.324	0	154
	D7, D8	22.665	0.0230472	574482	7013.94	155	0
	L7, L8	34.6275	0.52677	1036.18	285.461	155
	D10, D9	23.5776	0.202922	355275	38118.5	156	0
	L10, L9	35	0	834.324	0	156
	D11, D12	26.7357	0.494759	67628.3	17525.4	157	0
	L11, L12	0	0	0	0	157
	D13, D14	23.0596	0.0854387	466349	21100.7	158	0
	L13, L14	35	0	834.324	0	158
	D15, D16	22.7934	0.00625037	536704	1777.13	159	0
	L15, L16	35	0	834.324	0	159
	D17, D18	31.1706	0.133078	6351.92	447.434	160	0
	L17, L18	0	0	0	0	160
	D19, D20	31.9502	0.377131	4239.7	841.453	161	0.98
	L19, L20	22.6428	0.0605988	581409	18661.6	161
	D21, D22	34.4381	0.794644	1173.75	480.017	162	0.98
	L21, L22	25.0072	0.151025	166372	13296.7	162
	D23, D24	26.3779	0.105863	69479.1	5000.1	163	0.88
	L23, L24	21.9006	0.0320184	1.45992e+06	31801.7	163
	E1, E2	34.6088	0.553218	1048.56	302.98	164	0.98
	M1, M2	24.8787	0.221475	178423	20886.2	164
	E3, E4	34.8167	0.259179	923.725	126.433	165	1
	M3, M4	21.7433	0.0374855	936169	18589.5	165
	E5, E6	33.8228	0.0646305	1557.04	53.3003	166	0.99
	M5, M6	23.1322	0.00640488	448512	1521.82	166
	E7, E8	35	0	834.324	0	167	0.99
	M7, M8	23.1249	0.00387965	450259	925.406	167
	E10, E9	31.628	0.432687	5044.47	1146.27	168	0.97
	M10, M9	22.9585	0.000901663	491742	234.888	168
	E11, E12	35	0	834.324	0	169	0.98
	M11, M12	25.9835	0.0631096	99058.9	3311.21	169
	E13, E14	23.4433	0.0880951	380572	17754.5	170	0
	M13, M14	31.7739	0.142702	4615.28	348.572	170
	E15, E16	24.0475	0.184464	276847	27010.9	171	0
	M15, M16	33.5022	0.525989	1880.64	517.359	171
	E17, E18	23.744	0.0145377	324356	2498	172	0
	M17, M18	35	0	834.324	0	172
	E19, E20	23.2774	0.0567629	415411	12489.8	173	0.02
	M19, M20	28.1725	0.273766	31219.5	4511.96	173
	E21, E22	24.4414	0.608939	230019	72941.4	174	0
	M21, M22	34.0102	0.614527	1447.01	462.926	174
	E23, E24	23.2883	0.0238842	412924	5224.55	175	0
	M23, M24	32.8209	0.271542	2660.27	381.37	175
	F1, F2	23.1596	0.0425096	442098	9955.13	176	0
	N1, N2	34.7859	0.302751	940.534	150.204	176
	F3, F4	24.198	0.203873	255760	27569.4	177	0
	N3, N4	35	0	834.324	0	177
	F5, F6	34.5424	0.647185	1094.61	368.107	178	0.98
	N5, N6	25.4905	0.116749	128713	7955.7	178
	F7, F8	33.0952	0.55487	2338.27	677.598	179	0.95
	N7, N8	25.5441	0.0044344	124985	293.611	179
	F10, F9	26.4715	0.0183218	65110.5	811.641	180	0.5
	N10, N9	24.8351	0.0986829	198454	13314.7	180
	F11, F12	35	0	834.324	0	181	0.99
	N11, N12	24.8675	0.00227937	178865	215.982	181
	F13, F14	35	0	834.324	0	182	0.99
	N13, N14	24.5326	0.0790643	213683	8947.49	182
	F15, F16	33.9007	1.55464	1754.19	1300.88	183	0.98
	N15, N16	24.5705	0.05134	209388	5694.18	183
	F17, F18	35	0	834.324	0	184	1
	N17, N18	22.7807	0.0262058	540328	7500.99	184
	F19, F20	35	0	834.324	0	185	0.96
	N19, N20	26.7856	0.226543	64983.5	7780.22	185
	F21, F22	35	0	834.324	0	186	0.98
	N21, N22	25.9182	0.0970163	102585	5270.09	186
