# Supplementary material for: Specificity trumps flexibility—location-based stable associations between Symbiodiniaceae genera and Platygyra verweyi (Scleractinia; Merulinidae)
Source: PeerJ. 2020 May 5;8:e8791. doi: 10.7717/peerj.8791 (PMC7207216; doi:10.7717/peerj.8791)
Supplement: Supplemental Information 4 [file peerj-08-8791-s004.xlsx]

## Sheet: Sheet1
2014 reciprocal transplantation experiment - native cores										2015 reciprocal transplantation experiment - native cores													Bimonthly mother colonies
Group	2014 Apr	2014 Sep	2015 Jan	2015 Mar	2015 May	2015 July	2015 Sept	2015 Nov		Group	2015Apr	2015Sep	2015 Nov	2016Jan	2016 April	Group	2015Apr	2015Sep	2015 Nov	2016Jan	2016 April		Group	2019-11-14	2019-01-15	2019-03-15	2019-05-15	2019-07-15	2019-10-15	2019-11-15	2019-01-16	2019-04-16
WLT	0	0	0	0	0	0	0	0		NPP-OL	1	1	0.97	1	0.8	WLT	1	1	1	1	1		IL	1	1	1	1	1	1	1	0	0
WLT	0	0	0	0	0	0	0	0		NPP-OL	1	1	0.96	1	0.71	WLT	0.87	0.72	0.89	0.98	0.99		IL	1	1	0.99	1	1	1	0.99	0	0
WLT	0	0	0	0	0	0	0	0.17		NPP-OL	1	1	0.96	1	0.82	WLT	1	1	1	1	1		IL	1	1	1	1	1	0	1	0	0
WLT	0	0.04	Dead	Dead	Dead	Dead	Dead	Dead		NPP-OL	1	1	0.93	1	0.56	WLT	1	1	0.73				IL	1	1	1	0.99	1	0.71	1	0	0
WLT	0	0	0	Dead	Dead	Dead	Dead	Dead		NPP-OL	1	1	0.97	1	0.55	WLT	1	1	1	1	1		IL	1	1	1	0.99	1	1	1	0	0
NPP-IL	0	0	0	0	0	NA	NA	NA		NPP-OL	1	1	0.99	1	0.82	WLT	1	1	1	1	1		WLT	1	1	1	1	1	1	1	1	1
NPP-IL	0	0	0	0	0	NA	NA	NA		NPP-OL	1	1	0.97	1	0.62	WLT	1	0.92	0.99	0.97	0.99		WLT	1	1	1	1	1	1	1	1	1
NPP-IL	0	0	0	0	0	NA	NA	NA		NPP-OL	1	1	0.92	1	0.91	WLT	NA	0.77	0.82	0.95	0.99		WLT	1	1	1	1	1	1	1	1	1
NPP-IL	0	0	0	0	0	NA	NA	NA		NPP-OL	1	1	0.99	1	0.97	WLT	1	1	1	1	1		WLT	1	1	1	1	1	1	1	1	1
NPP-IL	0	0	0	0	0.01	NA	NA	NA		NPP-OL	1	1	0.92	1	0.68	WLT	1	1	1	1	1		WLT	1	1	1	1	1	1	1	1	1
NPP-OL	1	1	1	0.98	0.96	0.97	0.98	0.98		NPP-OL	1	1	0.89	1	0.39	WLT	1	1	1	1	0.99		WLT	0.98	1	1	1	0.99	1	1	1	0.98
NPP-OL	1	1	1	0.79	0.87	0.82	0.82	Dead		NPP-OL	1	1	0.97	1	0.77	WLT	1	1	1	1	1		WLT	1	1	1	1	1	1	1	1	1
NPP-OL	1	1	1	0.99	1	1	1	0.98		NPP-OL	1	1	0.93	1	0.7	WLT	1	1	1	1			WLT	1	1	1	1	1	1	1	1	1
NPP-OL	1	1	1	0.99	1	1	1	0.96		NPP-OL	1	1	0.99	1	0.9	WLT	1	1	1	1	1		OL	0.72	0.99	0	0.97	0.93	0.49	0.81	0.98	0.98
NPP-OL	1	1	1	0.95	0.97	0.99	1	0.99		NPP-OL	1	1	0.98	1	0.7	WLT	1	1	1	1	1		OL	0.99	1	1	1	0.98	0.98	1	0.98	0.95
										NPP-OL	1	1	0.99	1	0.87	WLT	1	1	0.13	1	1		OL	0.99	1	0.99	0.99	0.99		0.99	0.88	0.5
										NPP-OL	0.81	1	0.97	1	0.83	WLT	1	1	1	1	1		OL	1	1	1	1	0.99	0.99	0.99	0.98	0.99
						COL= native NPP-OL				NPP-OL	1	1	0.96	1	0.89	WLT	1	1	1	1	1		OL	0.98	0.98	0.98	0.93	0.97	0.99	0.99	1	0.99
						TOW= NPP-OL to WLT transfer				NPP-OL	1	1	0.99	1	0.83	WLT	1	1	1	1	1		OL	0.98	1	0.99	0.91	0.98	0.98	0.99	0.99	0.98
						TOI= NPP-OL to IL transfer				NPP-OL	1	1	0.98	1	0.83	WLT	1	1	1	1	1		OL	0.97	1	1	1	1	0.98	0.98	0.99	1
						CWLT= native WLT				NPP-OL	1	1	0.88	NA	0.59	WLT	1	1	0.31	1	1		OL	1	0.98	0.94	0.98	0.98	0.98	1	0.98	0.98
						CIL= native IL				NPP-OL	1	1	0.94	1	0.71	WLT	1	1	0.99	1	1		OL	1	1	0.96	0.99	0.94	0.99	1	0.97	0.96
						TWO= WLT to NPP-OL transfer				NPP-OL	1	1	0.77	1	0.81	WLT	0.2	0.23	0.16	0.3	0.29
										NPP-OL	1	1	0.99	1	0.91	WLT	0.81	0.55	0.44	0.87	0.98
										NPP-OL	1	1	0.95	1	0.73	WLT	0.14	0.05	0.16	0.33	1
										NPP-OL	1	1	0.98	1	0.94	WLT	1	1	0.98	1	1
										NPP-OL	1	1	0.99	1	0.91	WLT	1	1	0.96	1	1
										NPP-OL	1	1	0.98	1	0.92	WLT	1	1	0.91
										NPP-OL	1	1	0.93	1	0.77	WLT	1	1	0.99	1	1
										NPP-OL	1	1	0.96	1	0.78	WLT	1	1	1	1	1
										1= 100% Durusdinium			0= 0% Durusdinium			1= 100% Cladocopium			0= 0%Cladocopium
